# Supplementary material
Source: bioRxiv or medRxiv preprint supplement (https://www.biorxiv.org/highwire/filestream/67774/field_highwire_adjunct_files/10/157404-4.pdf)
Supplement: Supplementary file [file 157404-4.pdf]

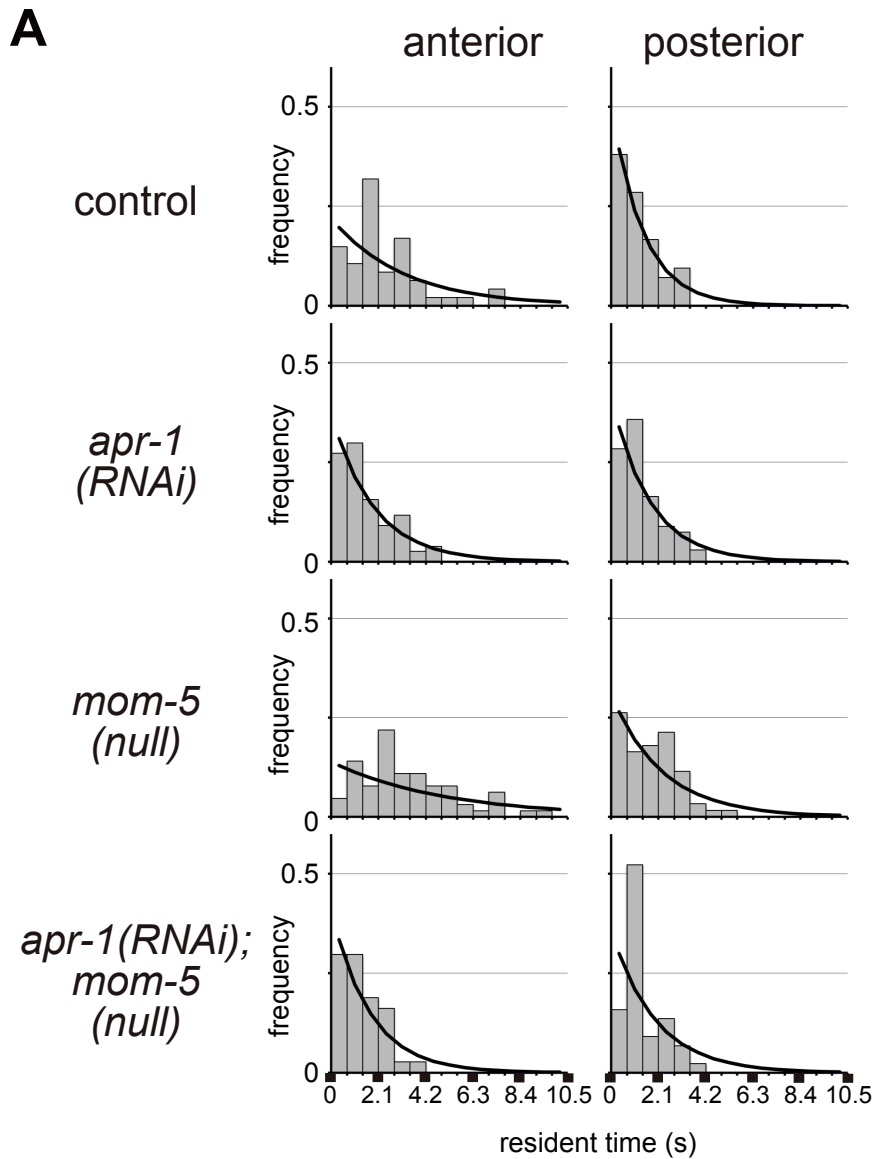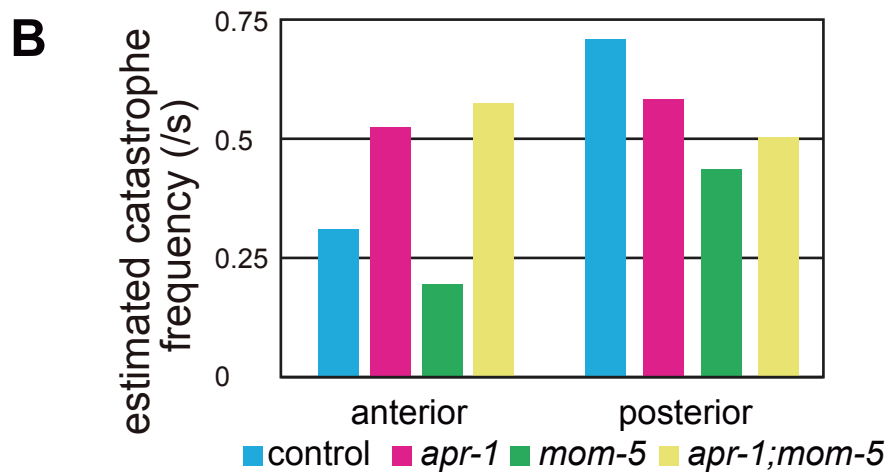

**Figure S4. Estimation of microtubule catastrophe frequencies at the cortex.**

(A) Frequencies of MT residence times at the cell cortex observed experimentally (histograms) and predicted from the estimated catastrophe frequencies (black lines). (B) Estimated catastrophe frequencies for indicated genotypes. The data is the same as in Supplementary Table 1.
